# Supplementary material for: Comparison of sequencing data processing pipelines and application to underrepresented African human populations
Source: PubMed Central journal article supplement (PMC8502359; doi:10.1186/s12859-021-04407-x), 2021-10-09
Supplement: 12859_2021_4407_MOESM1_ESM.pdf [file 12859_2021_4407_MOESM1_ESM.pdf]

Comparison of sequencing data processing pipelines and application to underrepresented human populations Additional File 1.

**Comparison of high coverage whole genome processing pipelines (humans)**

| Study                     | Samples details                                                                        | Pre-processing + mapping                                                                                                                                                       | Human genome build   | BAM processing                                                                                                                                                                                                                                                                               | SNPs calling                                                                                                                                                                                    | Indels calling                                                                          | Callset filtering                                                                                                                                                          | Comments |
|---------------------------|----------------------------------------------------------------------------------------|--------------------------------------------------------------------------------------------------------------------------------------------------------------------------------|----------------------|----------------------------------------------------------------------------------------------------------------------------------------------------------------------------------------------------------------------------------------------------------------------------------------------|-------------------------------------------------------------------------------------------------------------------------------------------------------------------------------------------------|-----------------------------------------------------------------------------------------|----------------------------------------------------------------------------------------------------------------------------------------------------------------------------|----------|
| (Wong et al. 2013)        | 100 Southeast Asian Malays<br>Sequencing platform: Illumina HiSeq2000 ~ 30X            | -Alignment: Illumina CASAVA GERALD module                                                                                                                                      | hg19 with PAR masked | -optical duplicate flagging, likely with the CASAVA pipelines<br>-exclusion of some individuals (ancestry; anomalous distribution of insert size)                                                                                                                                            | Two methods:<br>1-single-sample variant caller in CASAVA,<br>2-SAMtools v0.1.17 multisample variant-caller mpileup                                                                              | -Same as for SNPs<br>-For deletions > 50 bp: BreakDancer v.1.1 and VariationHunter v0.3 | -Hard filtering                                                                                                                                                            | -        |
| (H. L. Kim et al. 2014)   | five Khoe-San one Bantu-speaker<br>Sequencing platform: Illumina HiSeq                 | -bwa v.0.5.9 with default parameters except for '-q 15' to soft-trim low quality bases at the 3' end of reads                                                                  | hg19                 | -GATK IndelRealignment<br>-Picard MarkDuplicates                                                                                                                                                                                                                                             | -Obtained diploid consensus sequence with SAMtools mpileup -C 50<br>Then marked locations as missing data (see Callset filtering) and used SAMtools v0.1.18 to "identify the location of SNPs". | -Same as SNPs calling given the pipeline used (SAMtools).                               | -Hard filtering                                                                                                                                                            | -        |
| (Auton et al. 2015)       | High coverage genomes (30 individuals) from 1000 Genomes phase 3<br>Illumina HiSeq2500 | -bwa mem<br>-Adapter clipping with MarkIlluminaAdapters.jar                                                                                                                    | GRCh37 with decoy    | -Indel realignment GATK<br>-BQSR GATK                                                                                                                                                                                                                                                        | -NA                                                                                                                                                                                             | -NA                                                                                     | -NA                                                                                                                                                                        | -        |
| (Besenbacher et al. 2015) | 30 Danes (ten trios)<br>Sequencing platform: Illumina HiSeq2000                        | -Adapter-Removal to: trim the tails of the reads if the Phred quality dropped < 2.<br>collapse 180 bp insert size libraries into longer single end reads<br>-bwa-mem v.0.7.5.a | hg 19 decoy          | -SAMtools v.0.1.19 and Picard v.1.96 to "process the alignment files and mark duplicate reads" (at lane level).<br>-Indel realignment with GATK v.2.7.2 (at lane level and after merging) with Mills and 1000G gold standard and dbSNP138.<br>-BQSR with GATK v.2.7.2 at lane level and with | -GATK v2.7.2: HaplotypeCaller for multi-sample genotyping                                                                                                                                       | -Same as for SNPs.                                                                      | GATK: VQSR<br>-SNPs: datasets: HapMap, Omnichip, 1000G phase1 high confidence variants, dbSNP138<br>Annotations: QD, MQRankSum, ReadPosRankSum, FS, DP<br>--numBadVariants | -        |

|                                |                                                                                                                                                                       |                                                                                                           |               |                                                                                                                                                                                                                                                                                                      |                                                                                                                                                                                                       |                                                                                                                                                             |                                                                                                                                                                                      |   |
|--------------------------------|-----------------------------------------------------------------------------------------------------------------------------------------------------------------------|-----------------------------------------------------------------------------------------------------------|---------------|------------------------------------------------------------------------------------------------------------------------------------------------------------------------------------------------------------------------------------------------------------------------------------------------------|-------------------------------------------------------------------------------------------------------------------------------------------------------------------------------------------------------|-------------------------------------------------------------------------------------------------------------------------------------------------------------|--------------------------------------------------------------------------------------------------------------------------------------------------------------------------------------|---|
|                                |                                                                                                                                                                       |                                                                                                           |               | dbSNP138.                                                                                                                                                                                                                                                                                            |                                                                                                                                                                                                       |                                                                                                                                                             | 5000<br>tranche: 99.5<br>-INDELS:<br>dataset: Mills and<br>1000G<br>--maxGaussians 4<br>--numBadVariants<br>1000<br>tranche: 95.0                                                    |   |
| (Gudbjartsson et al. 2015)     | 2,636 Icelanders at ~20 X<br>Sequencing platform: Illumina GAI <sub>x</sub> and/or HiSeq2000                                                                          | -BWA v.0.5.7-0.5.9 then alignments merged into a single BAM                                               | hg18          | -Alignments for a given individual merged into a single BAM file<br>-Picard v.1.55: duplicates marking<br>-GATK v.1.2-29-g0acaf2d: realignment around indels and BQSR                                                                                                                                | -Multi-sample variant calling GATK v.2.3.9 (algorithm: NA, but likely UnifiedGenotyper)                                                                                                               | -Multi-sample variant calling GATK v.2.3.9 (algorithm: NA, but likely UnifiedGenotyper)                                                                     | -Hard filtering for SNVs and indels, using GATK recommended filters and additional filters.<br>-Regional filter (simple-repeat regions).                                             | - |
| (Nagasaki et al. 2015)         | 1,070 Japanese<br>Sequencing platform: HiSeq 2500                                                                                                                     | Two strategies:<br>1-Bowtie2 v.2.1.0 with '-X 2000' option<br>2-bwa-mem v.0.7.5a-r405 with default option | hg19<br>decoy | Depending on the mapping strategy:<br>1-BCFtools v.0.1.17-dev (Bowtie alignment)<br>2-GATK v2.5-2 (bwa alignment) (algorithm: NA)<br><br>For downstream analyses, used the outcome of the first strategy (bowtie+BCFtools).                                                                          | -Short structural variants (<100 bp): GATK HaplotypeCaller v.2.5-2 on bwa alignment<br>-Long structural variants: BreakDancer v.1.1 and Pindel v.0.2.5a3<br>-CNV: CNVnator v.0.3                      | -Hard filtering (genotype depth filter per individual, SNV depth filter per locus, genome complexity filter, tool bias filter, population genetics filter). | -                                                                                                                                                                                    |   |
| (UK10K Consortium et al. 2015) | ~10,000 individuals of which:<br>~4,000: WG at ~7X from two British cohorts of European ancestry and<br>~6,000: exomes at ~80X<br>Sequencing platform: Illumina HiSeq | -sequencing reads failing QC removed with the Illumina GA pipeline<br>-bwa v.0.5.9-r16: bwa aln -q15      | hg19          | -Obtained sorted BAM from SAM files: Picard v1.36 and SAMtools v0.1.11 / or SAMtools v0.1.8 only.<br>-Mark duplicates with Picard MarkDuplicates / or SAMtools rmdup<br>-GATK v.1.1-5-g6f43284, Picard v.1.64, SAMtools v.0.1.16: Realignment around indels, BQSR, addition of BAQ tags, merging and | -SAMtools mpileup -C50 -d 8000/bcftools v. 0.1.18-r579 (pooling all individuals).<br>-GATK v.1.3-21 UnifiedGenotyper for SNVs to recall the sites found by the SAMtools/BCFtools pipeline to generate | -SAMtools mpileup -C50 -d 8000/bcftools v. 0.1.18-r579 (pooling all individuals).                                                                           | -SNV: GATK VQSR with default parameters and datasets (dbSNP132), tranche 99.5<br>-indels: pre-filtering due to technical issues + GATK VQSR, did not use dbSNP but used 1000 Genomes | - |

|                         |                                                                                                                                                                     |                                                                                                                                                                                                                                    |               |                                                                                                                                                                                                                                                                                                                                    |                                                                                                                        |                                                                          |                                                                                                      |                                                                                                                       |
|-------------------------|---------------------------------------------------------------------------------------------------------------------------------------------------------------------|------------------------------------------------------------------------------------------------------------------------------------------------------------------------------------------------------------------------------------|---------------|------------------------------------------------------------------------------------------------------------------------------------------------------------------------------------------------------------------------------------------------------------------------------------------------------------------------------------|------------------------------------------------------------------------------------------------------------------------|--------------------------------------------------------------------------|------------------------------------------------------------------------------------------------------|-----------------------------------------------------------------------------------------------------------------------|
|                         |                                                                                                                                                                     |                                                                                                                                                                                                                                    |               | duplicate marking (“follows that used for Illumina low-coverage data in 1000GP”.)                                                                                                                                                                                                                                                  | annotations used in VQSR.                                                                                              |                                                                          | Phase I.                                                                                             |                                                                                                                       |
| (Fakhro et al. 2016)    | 108 unrelated Qataris<br>Sequencing platform: Illumina HiSeq2500 (+ 1,268 exomes on one of three platforms)<br>One individual sequenced on three platforms + HiSeqX | -BWA v.0.5.9 with maximum insert size 3 kb                                                                                                                                                                                         | hg19          | -SAMtools: PCR duplicates removal<br>-“mapped reads were prepared for variant calling using GATK Best Practices”: GATK realignment of indels and BQSR?                                                                                                                                                                             | -Group-call with GATK (algorithm and version: NA, but likely UnifiedGenotyper - see Comments)                          | -Short indels (<300 bp) called with the CASAVA v1.9 pipeline by Illumina | -Hard filtering based on comparing different batches and results for the quadruple-sequenced Qatari. | -Also tested mapping to a Qatari reference genome.<br>-Joint calling of exomes and genomes with GATK UnifiedGenotyper |
| (Haber et al. 2016)     | four Lebanese<br>eleven Chadians<br>four Greeks<br>Sequencing platform: Illumina HiSeq X or HiSeq2500<br>Genomes were not the main focus of the paper.              | NA                                                                                                                                                                                                                                 | NA            | NA                                                                                                                                                                                                                                                                                                                                 | -SAMtools v.1.2 and BCFtools v.1.2: samtools mpileup -q 20 -Q 20 -C 50   bcftools call -c -V indels                    | -Same as SNPs calling given the pipeline used (SAMtools + BCFtools)      | NA                                                                                                   | -                                                                                                                     |
| (Malaspina et al. 2016) | 83 Australians<br>25 Papuans<br>Sequencing platform: Illumina HiSeq X                                                                                               | -adapter trimming (Adapter-Removal-1.5.4) + trimmed leading / trailing stretches of Ns + bases with quality 2.<br>Kept reads of >= 30 bp<br>-bwa-mem<br>-re-aligned with stampy v.1.0.23 (option: keep good mapped reads from bwa) | hg19          | -Picard v.1.127<br>-add read groups<br>-sort reads<br>-merge reads at the library level<br>-duplicate reads marked and merged at the sample level<br>-GATK: indel realignment (with Mills and 1000G gold standard)<br>-Removed reads with mapping quality <30<br>-SAMtools calmd: recalculated the md tags and added extended BAQs | -Per sample: SAMtools v.0.1.18 and BCFtools v.0.1.17: mpileup -C50   bcftools                                          | -Same as SNPs calling given the pipeline used (SAMtools + BCFtools)      | -Hard filtering                                                                                      | -                                                                                                                     |
| (Mallick et al. 2016)   | 300 samples from 142 worldwide populations (22 of which were produced earlier)<br>Sequencing platform: Illumina HiSeq2000                                           | -adapter trimming: extract and shuffle reads from BAM with htlib, run trimadapt<br>-bwa-mem v0.7.10-r1005-dirty<br>-RG added during alignment                                                                                      | hg19<br>decoy | -mark optical duplicates with <i>samblaster</i><br>-SAMtools: sort                                                                                                                                                                                                                                                                 | -Per sample. Biallelic SNPs. Modification of UnifiedGenotyper developed with the GATK team to minimize reference bias. | -FermiKit-0.8 for the 263 fully public samples.                          | -Hard filtering                                                                                      | -                                                                                                                     |

|                         |                                                                                                                                                             |                                                                                                              |                            |                                                                                                                                                                                                                     |                                                                                                                                                                                                                                                                   |                                                            |                                                                                                                                               |                                                                                                                                                                                                                                                                      |
|-------------------------|-------------------------------------------------------------------------------------------------------------------------------------------------------------|--------------------------------------------------------------------------------------------------------------|----------------------------|---------------------------------------------------------------------------------------------------------------------------------------------------------------------------------------------------------------------|-------------------------------------------------------------------------------------------------------------------------------------------------------------------------------------------------------------------------------------------------------------------|------------------------------------------------------------|-----------------------------------------------------------------------------------------------------------------------------------------------|----------------------------------------------------------------------------------------------------------------------------------------------------------------------------------------------------------------------------------------------------------------------|
| (Telenti et al. 2016)   | 10,000 individuals: “representatives of major human populations and ancestries” (8,096 unrelated)<br>Sequencing platform: Illumina HiSeqX                   | -ISIS Analysis Software v.2.5.26.13                                                                          | hg38 with Y chr PAR masked | -ISIS Isaac Aligner v. 1.14.02.06: mark duplicates.<br>-Picard v. 1.113-1.131: to “characterize[d]” bam files.                                                                                                      | -ISIS Isaac Variant Caller v.2.0.17 with default settings.                                                                                                                                                                                                        | -ISIS Isaac Variant Caller v.2.0.17 with default settings. | -Comparison of variants found in NA12878 to the results from the Genome in a Bottle Consortium.                                               | -                                                                                                                                                                                                                                                                    |
| (Ameur et al. 2017)     | 1000 Swedes                                                                                                                                                 | -bwa mem -M -R (added read group information)                                                                | hg19                       | -SAMtools: sort alignment<br>-Picard: merge all BAM files corresponding to a sample<br>-GATK IndelRealignment with Mills and 1000G gold standard and dbSNP138<br>-Picard MarkDuplicates<br>-GATK BQSR with dbSNP138 | -HaplotypeCaller<br>CombineGVCF<br>GenotypeGVCFs<br>CatVariants (merge the non-overlapping intervals)                                                                                                                                                             | -Same as SNPs calling given the pipeline used.             | -VQSR (SNPs and indels) GATK-recommended datasets                                                                                             | -                                                                                                                                                                                                                                                                    |
| (Choudhury et al. 2017) | 24 South Africans: -eight Coloured -seven Sotho-speakers -eight Xhosa-speakers (Nguni) -one Zulu-speaker (Nguni)<br>Sequencing platform: Illumina HiSeq2000 | -Isaac Analysis Pipeline v.2.0.2. During mapping, low quality 3' ends and of adaptor sequences were trimmed. | hg19                       | -Isaac Analysis Pipeline v.2.0.2: marking of duplicates, realignment of indels.<br>-GATK v.3.2.2: BQSR.<br>-SAMtools v.1.1-26-g29b0367: flagstats.<br>-Checked that all samples pass thresholds (quality of reads). | Three callsets:<br>1.Isaac variant caller<br>2.GATK v.3.2-2 HaplotypeCaller default parameters<br>3.GATK v.3.2-2 HaplotypeCaller stand_call_conf 50<br>For approaches 2 and 3:<br>GenotypeGVCFs for the three groups (Coloured, Sotho, Xhosa+Zulu) independently. | -Isaac variant caller (indels and CNV)                     | For SNV:<br>> Isaac callset: hard filtering<br>> GATK callsets: VQSR with default parameters and datasets, tranche 99.5<br>Then took overlap. | -                                                                                                                                                                                                                                                                    |
| (Harris et al. 2018)    | 150 individuals from Peru (Native American and mestizo) ~35X<br>Illumina HiSeqX10                                                                           | -bwa mem                                                                                                     | Hg19                       | -MarkDuplicates Picard<br>-IndelRealignment GATK<br>-BQSR GATK                                                                                                                                                      | -HaplotypeCaller<br>GATK<br>-GenotypeGVCF<br>GATK<br>It is written “variants called using GATK in each individual’s genome”.<br>UnifiedGenotyper is run too.                                                                                                      | -See for SNPs                                              | -Hard filtering                                                                                                                               | Processing was performed at the sequencing center. Do not specify version.<br><a href="http://www.nygenome.org/wp-content/uploads/2018/01/Whole-Genome-Sequencing-Germline.pdf">www.nygenome.org/wp-content/uploads/2018/01/Whole-Genome-Sequencing-Germline.pdf</a> |

|                         |                                                                                                                                         |                                                                                        |                                                       |                                                                                                                                                                               |                                                                                                                                                    |                                                  |                                                                                        |                               |
|-------------------------|-----------------------------------------------------------------------------------------------------------------------------------------|----------------------------------------------------------------------------------------|-------------------------------------------------------|-------------------------------------------------------------------------------------------------------------------------------------------------------------------------------|----------------------------------------------------------------------------------------------------------------------------------------------------|--------------------------------------------------|----------------------------------------------------------------------------------------|-------------------------------|
| (J. Kim et al. 2018)    | 50 unrelated Korean individuals                                                                                                         | -cleaning of raw reads by Sickle: keep quality score >20 and read length >50bp<br>-bwa | hg19                                                  | -Removal of PCR duplicates<br>-Indels realignment and recalibration (software: NA)                                                                                            | -GATK-Lite-2.3-9: UnifiedGenotyper by individual                                                                                                   | -GATK-Lite-2.3-9: UnifiedGenotyper by individual | -Hard filtering for SNVs and indels.                                                   | -                             |
| (Jeong et al. 2018)     | 17 individuals (four Tibetans mother-daughter duos and three Sherpa trios), ~20X (plus 36 low coverage).<br>Illumina HiSeq2500 and 4000 | -bwa backtrack v0.7.4 with -q 15 option                                                | hg19                                                  | -MarkDuplicates with Picard v1.98<br>-IndelRealignment GATK v2.8-1<br>-BQSR GATK v2.8-1<br>-filtered reads with Phred-scaled mapping quality lower than 30 with SAMtools v1.2 | -GotCloud                                                                                                                                          | -GotCloud                                        | -GotCloud                                                                              | -                             |
| (Natarajan et al. 2018) | “TOPMED phase 1” cohort: 8,394 individuals from the USA (various ancestries, three studies: JHS, FHS, OOA)                              | -Not specified                                                                         | 1000 Genomes hs37d5 build 37 decoy reference sequence | -TOPMED phase 1: GotCloud                                                                                                                                                     | -TOPMED phase 1: GotCloud “freeze 3a” (vt discover2 software)                                                                                      | -TOPMED phase 1: GotCloud “freeze 3a”            | -TOPMED phase 1: GotCloud “freeze 3a” (hard filtering)                                 | -                             |
|                         | “TOPMED phase 2” (MESA study, 4510 individuals) and FINRISK (n=1165) and EST (n=2255) Illumina HiSeqX                                   |                                                                                        | hg19                                                  | -Not specified                                                                                                                                                                | -HaplotypeCaller GATK v3<br>-GenotypeGVCF                                                                                                          | -HaplotypeCaller GATK v3<br>-GenotypeGVCF        | -VQSR GATK<br>-hard filtering                                                          | -                             |
| (Okada et al. 2018)     | 2234 individuals from Japan 20-35X<br>Illumina HiSeq2500 or Illumina HiSeq X Five                                                       | -Adaptor trimming with Trimmomatic (v0.36 for datasets 2 and 3)<br>-bwa mem v0.7.5a    | GRCh37/hg19, hs37d5 - decoy                           | -MarkDuplicates Picard (v1.106 for datasets 1 and 2, v2.5.0 for dataset 3)<br>-Indel realignment and BQSR GATK (v3.2-2, 3.5-0 and 3.6 respectively)                           | -HaplotypeCaller GATK<br>-GenotypeGVCF GATK (?)                                                                                                    | -Same as for SNPs                                | -Hard filtering<br>-then VQSR GATK<br>-genotype refinement with beagle<br>-and more... | -                             |
| (S. Fan et al. 2019)    | 43 individuals from 22 African groups (analyzed together with 29 previously sequenced – Mallick 2016).<br>Illumina HiSeq2000            | -Adaptor trimming<br>-bwa mem version 0.7.12                                           | Hs37d5                                                | -mark optical duplicates with <i>sambaster</i><br>-SAMtools: sort                                                                                                             | Per sample. Biallelic SNPs. Modification of UnifiedGenotyper developed with the GATK team for GATK<br>UnifiedGenotyper to minimize reference bias. | -NA                                              | -Hard filtering                                                                        | Same as (Mallick et al. 2016) |
| (Lorente-               | Nine individuals from                                                                                                                   | -bwa v0.6.1 aln -n 6 -q                                                                | GRCh37                                                | -MarkDuplicates Picard v1.70                                                                                                                                                  | -UnifiedGenotyper                                                                                                                                  | -Not called                                      | -VQSR GATK v2.5-                                                                       | -                             |

|                           |                                                                                                                                                                                                        |                                                                                                                                                                                                   |                         |                                                                                                               |                                                                                                                                                                                                                                                                                       |                    |                                                                                                                                                                                                              |                                                                  |
|---------------------------|--------------------------------------------------------------------------------------------------------------------------------------------------------------------------------------------------------|---------------------------------------------------------------------------------------------------------------------------------------------------------------------------------------------------|-------------------------|---------------------------------------------------------------------------------------------------------------|---------------------------------------------------------------------------------------------------------------------------------------------------------------------------------------------------------------------------------------------------------------------------------------|--------------------|--------------------------------------------------------------------------------------------------------------------------------------------------------------------------------------------------------------|------------------------------------------------------------------|
| Galdos et al. 2019)       | African origin. 21-47X<br>Illumina HiSeq2000                                                                                                                                                           | 15 and sampe                                                                                                                                                                                      | with Epstein-Barr virus | -IndelRealignment GATK v2.5-2<br>-BQSR GATK v2.5-2                                                            | GATK v2.5-2                                                                                                                                                                                                                                                                           |                    | 2<br>-Defined a callable genome filter (based on their data and other information e.g. TandemRepeatMarker)                                                                                                   |                                                                  |
| (Serra-Vidal et al. 2019) | 21 male individuals (17 North Africans, 2 Basque and 2 Iraqi) ~26X<br>Illumina HiSeq2000                                                                                                               | -Assess read quality with fastqc<br>-bwa v0.7.7                                                                                                                                                   | hg19                    | -Merged mapped reads<br>-MarkDuplicates Picard v2.8.3<br>-IndelRealignment GATK v4.0.12<br>-BQSR GATK v4.0.12 | -UnifiedGenotyper GATK GATK v4.0.12                                                                                                                                                                                                                                                   | -Not called        | -VQSR GATK GATK v4.0.12<br>-Defined a callable genome filter (based on their data and other information e.g. TandemRepeatMarker)                                                                             | -                                                                |
| (Bergström et al. 2019)   | 787 individuals from 54 populations (analyzed with 142 previously sequenced – Mallick 2016, Meyer 2012, Raghavan 2015) of which 26: linked-read technology (physical phasing).<br>Illumina HiSeqX ~35X | -Adaptor trimming with bamadapterclip (biobambam package)<br>-Mapping with bwa mem v0.7.12 with the -T 0 parameter<br>-Marking of duplicates with bamstreamingmarkduplicates (biobambam package). | GRCh38 with decoy       | -None.                                                                                                        | -HaplotypeCaller version 3.5.0. genotype priors without bias towards the reference allele through the "--input-prior 0.001 --input-prior 0.4995" arguments; "--pcr_indel_model NON" for the PCR-free libraries; "--includeNonVariantSites".<br>-GenotypeGVCF (guessed from the text). | -Same as for SNPs. | -Hard filtering because they wanted to filter both variant and non-variant sites (VQSR: only for variant sites). Filter on GQ/RGQ and DP.<br>-VQSR<br>-excess heterozygosity with BCFtools fill-tags plugin. | Wellcome Sanger Institute sequencing facility automated pipeline |

## Comparison of high coverage whole genome processing pipelines (non-humans)

| Study                                 | Samples details                                                                                                                                   | Pre-processing + mapping                                           | reference                       | BAM processing                                                                                                                                                                                                                                                                                                   | SNPs calling                                                                                   | Indels calling         | Variant recalibration                                                                 | Comments                                                                                                                              |
|---------------------------------------|---------------------------------------------------------------------------------------------------------------------------------------------------|--------------------------------------------------------------------|---------------------------------|------------------------------------------------------------------------------------------------------------------------------------------------------------------------------------------------------------------------------------------------------------------------------------------------------------------|------------------------------------------------------------------------------------------------|------------------------|---------------------------------------------------------------------------------------|---------------------------------------------------------------------------------------------------------------------------------------|
| (Z. Fan et al. 2014)                  | one Tibetan macaque analyzed together with four comparative genomes<br>Sequencing platform: Illumina HiSeq2000                                    | -Bowtie2 under local alignment algorithm with very sensitive model | rheMac2 (Indian rhesus macaque) | -Picard: mark duplicate reads<br>-GATK: indel realignment followed by fixing the mate pair information with FixMateInformation.jar<br>-GATK: “empirical BQSR”. Started by doing a variant call on the Tibetan macaque to get a list of SNPs to exclude from BQSR (to replace the dbSNP dataset used for humans). | -GATK: UnifiedGenotyper (each sample separately). Standard minimum confidence thresholds to 0. | -Same as SNPs calling. | -Hard filtering.                                                                      | -                                                                                                                                     |
| (Z. Fan et al. 2016)                  | nine wolves<br>one coyote<br>one golden jackal<br>analyzed together with 23 comparative canine genomes<br>Sequencing platform: Illumina HiSeq2000 | -Bowtie2 under local alignment algorithm with very sensitive model | CanFam3 .1                      | -Picard: mark duplicate reads<br>-GATK: indel realignment followed by fixing the mate pair information with FixMateInformation.jar<br>-GATK: “empirical BQSR”. Started by doing a variant call on the Tibetan macaque to get a list of SNPs to exclude from BQSR (to replace the dbSNP dataset used for humans). | -GATK: UnifiedGenotyper (each sample separately). Standard minimum confidence thresholds to 0. | -Same as SNPs calling. | -Hard filtering.                                                                      | -Same as (Z. Fan et al. 2014). The same pipeline was also used in studies not reviewed here (Zhang et al. 2014; Freedman et al. 2014) |
| (Friedenberg, Meurs, and Mackay 2016) | 64 dogs across eight breeds<br>Sequencing platform: Illumina HiSeq 2000 or 2500                                                                   | -Trimmomatic v0.32: trim reads<br>-bwa v.0.7.10                    | canFam3                         | -Picard v.1.115 (analysis performed not specified – mark duplicates?)<br>-GATK v.3.4: BQSR and indel realignment                                                                                                                                                                                                 | -GATK: HaplotypeCaller                                                                         | -GATK: HaplotypeCaller | -VQSR:<br>-dbSNP139<br>-Illumina CanineHD BeadChip<br>-SNPs: tranche 99.9, indels: 99 | -                                                                                                                                     |
| (Friedenberg, Lunn, and Meurs 2017)   | 20 dogs (Standard Poodles)                                                                                                                        | -Trimmomatic v0.32: trim reads<br>-bwa v.0.7.10                    | canFam3                         | -Picard v.1.115 (analysis performed not specified – mark duplicates?)<br>-GATK v.3.4: BQSR and indel realignment                                                                                                                                                                                                 | -GATK: HaplotypeCaller                                                                         | -GATK: HaplotypeCaller | -VQSR:<br>-dbSNP139<br>-Illumina CanineHD BeadChip<br>-SNPs: tranche 99.9, indels: 99 | -Same as (Friedenberg, Meurs, and Mackay 2016)                                                                                        |
| (Bimber et                            | 21 rhesus macaques                                                                                                                                | -Trimmomatic adaptive                                              | MacaM                           | -GATK: indel realignment                                                                                                                                                                                                                                                                                         | -GATK:                                                                                         | -Same as SNPs          | -Hard filtering                                                                       | -                                                                                                                                     |

|                |                                                                                                               |                             |                                                                                    |                                                                                                                                                                                                                                                                 |                                                                                                                     |                       |                 |   |
|----------------|---------------------------------------------------------------------------------------------------------------|-----------------------------|------------------------------------------------------------------------------------|-----------------------------------------------------------------------------------------------------------------------------------------------------------------------------------------------------------------------------------------------------------------|---------------------------------------------------------------------------------------------------------------------|-----------------------|-----------------|---|
| al. 2017)      | including two trios and multiple parent/child pairs<br>Sequencing platform: HiSeq2000 or 3000                 | quality trimming<br>-bwamem |                                                                                    | -Picard: marking of duplicates                                                                                                                                                                                                                                  | HaplotypeCaller + GenotypeGVCFs (emitting and calling threshold: 20)                                                | calling               |                 |   |
| (Pfeifer 2017) | seven publicly available green monkey (three generations pedigree)<br>Sequencing platform: Illumina HiSeq2000 | -bwa-mem v.0.7.13           | Repeat masked <i>Chlorocebus sabaeus</i> (green monkey) v.1.1 + Epstein-Barr virus | -Per read group:<br>-Picard v.2.1.1: Marking duplicates<br>-GATK v.3.5: indel realignment<br>-GATK v3.5: BQSR with ~500 k variants from the genome-wide SNPs panel of the Vervet Genetic Mapping Project<br>-Per sample:<br>-Picard v.2.1.1: Marking duplicates | -GATK v3.5: HaplotypeCaller, default heterozygosity rate 0.001 + GenotypeGVCF: 1-single-sample, 2-joint genotyping. | -Same as SNPs calling | -Hard filtering | - |
