# Supplementary material for: Comparison of sequencing data processing pipelines and application to underrepresented African human populations
Source: PubMed Central journal article supplement (PMC8502359; doi:10.1186/s12859-021-04407-x), 2021-10-09
Supplement: 12859_2021_4407_MOESM4_ESM.pdf [file 12859_2021_4407_MOESM4_ESM.pdf]

A. All variant sites before VQSR.

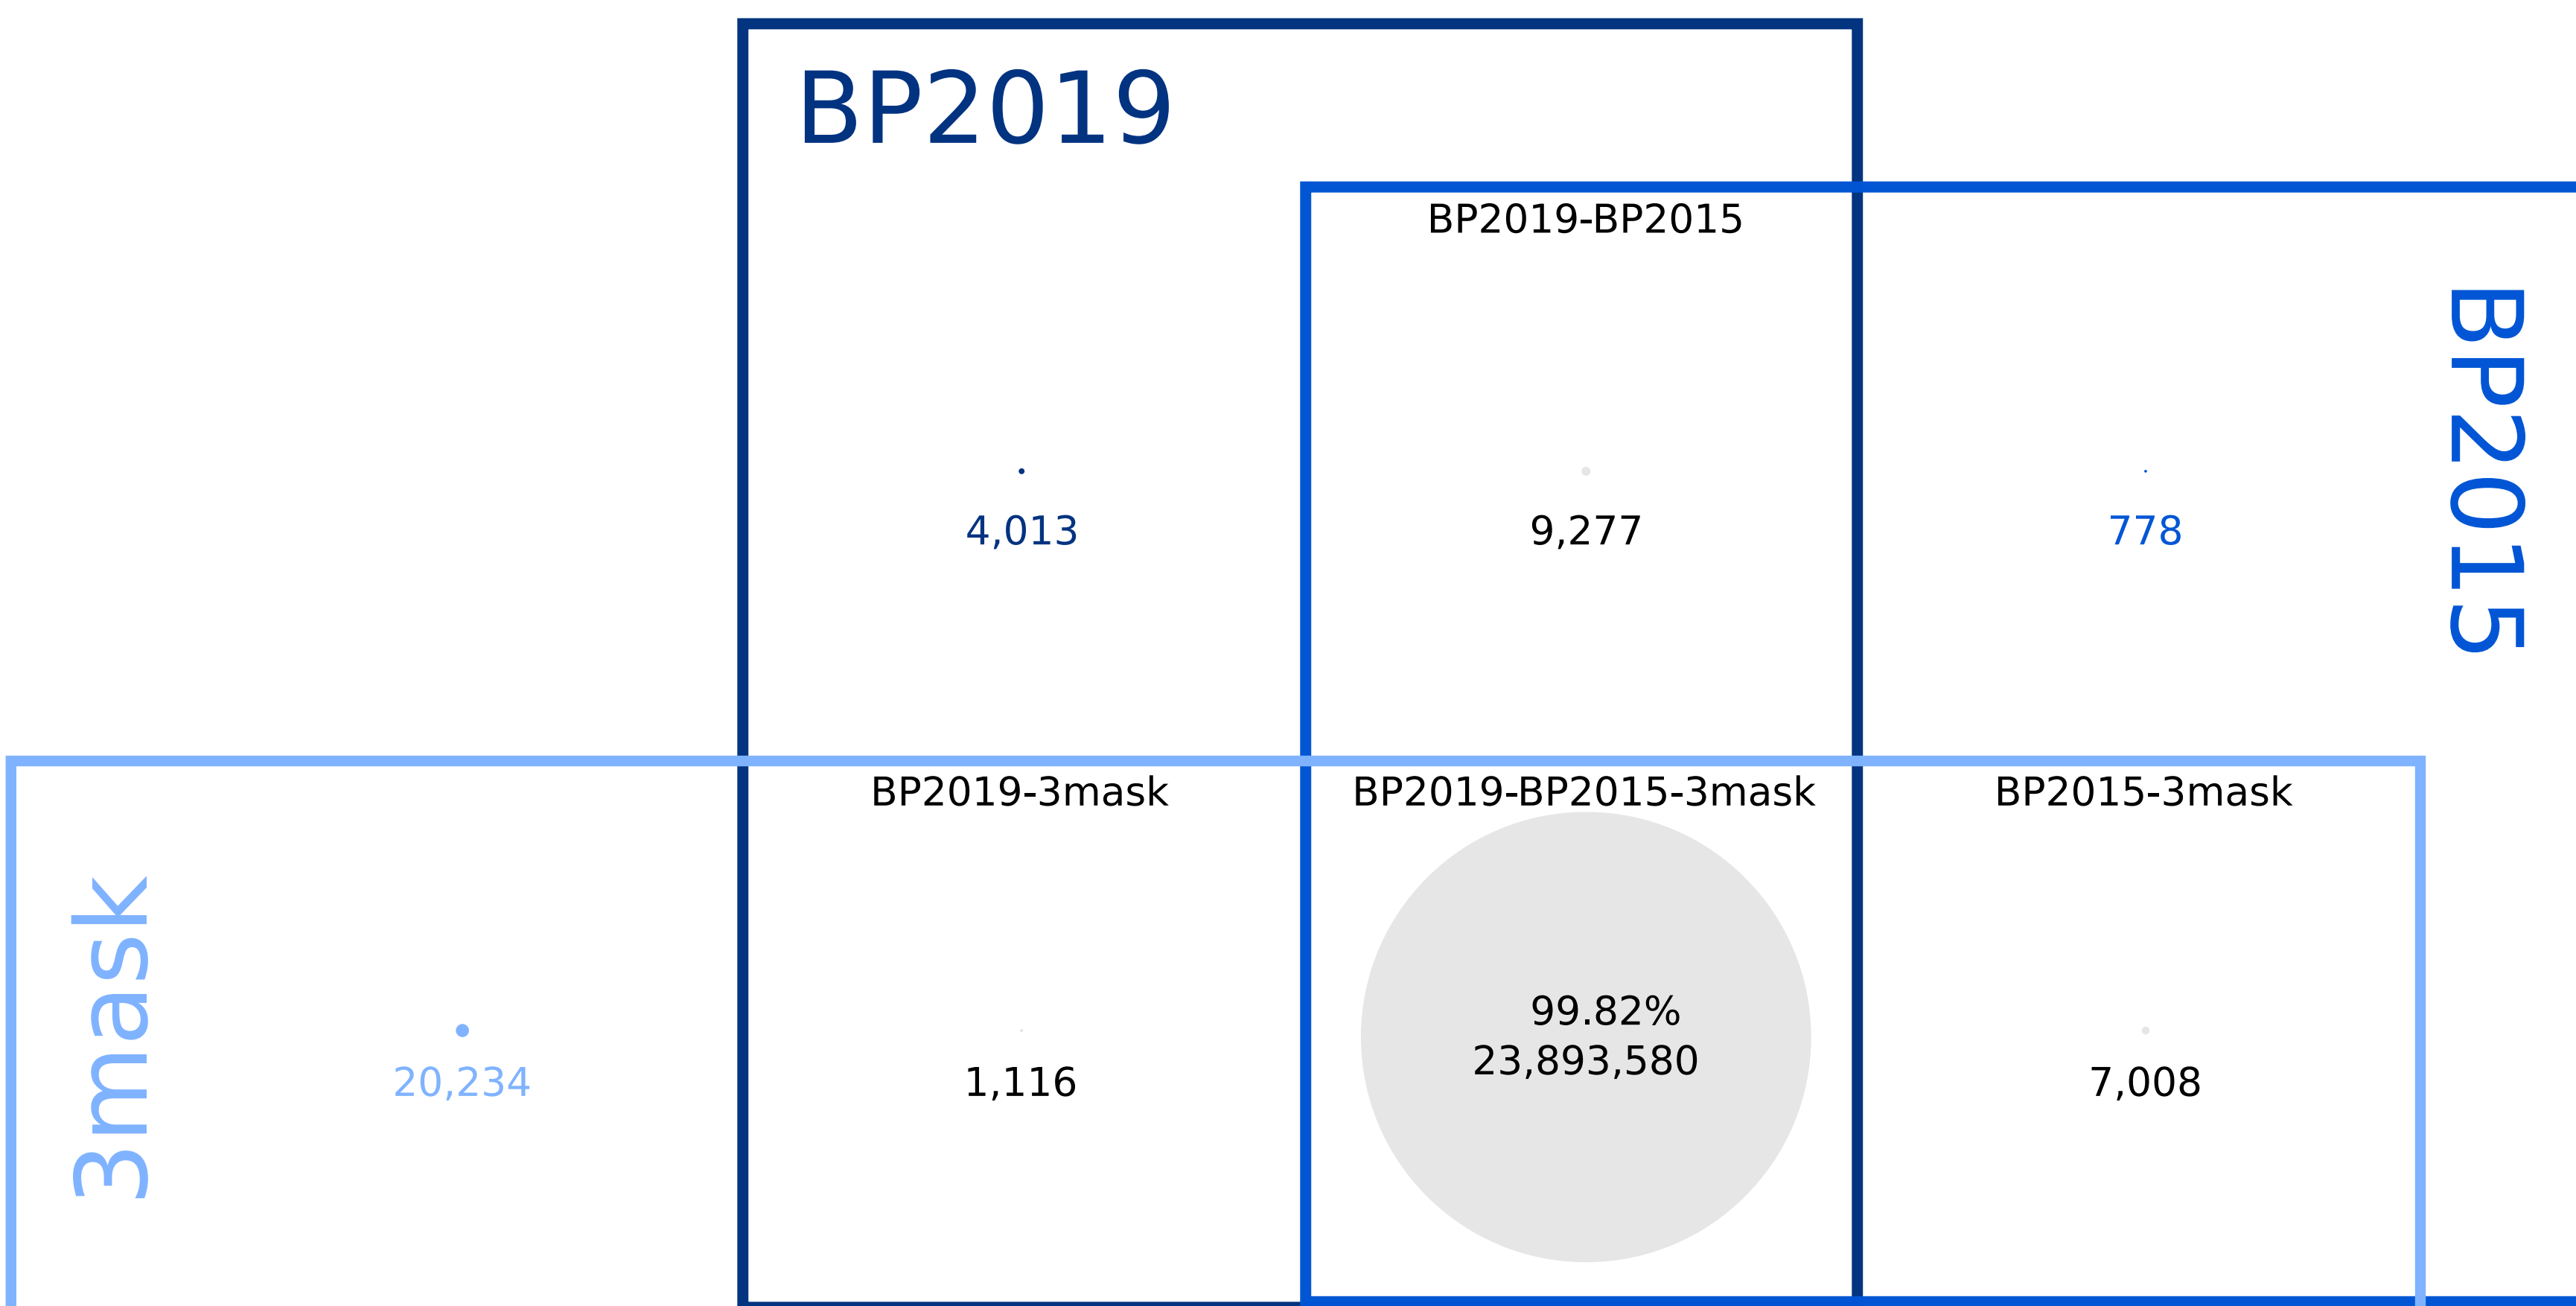

B. Biallelic SNP before VQSR.

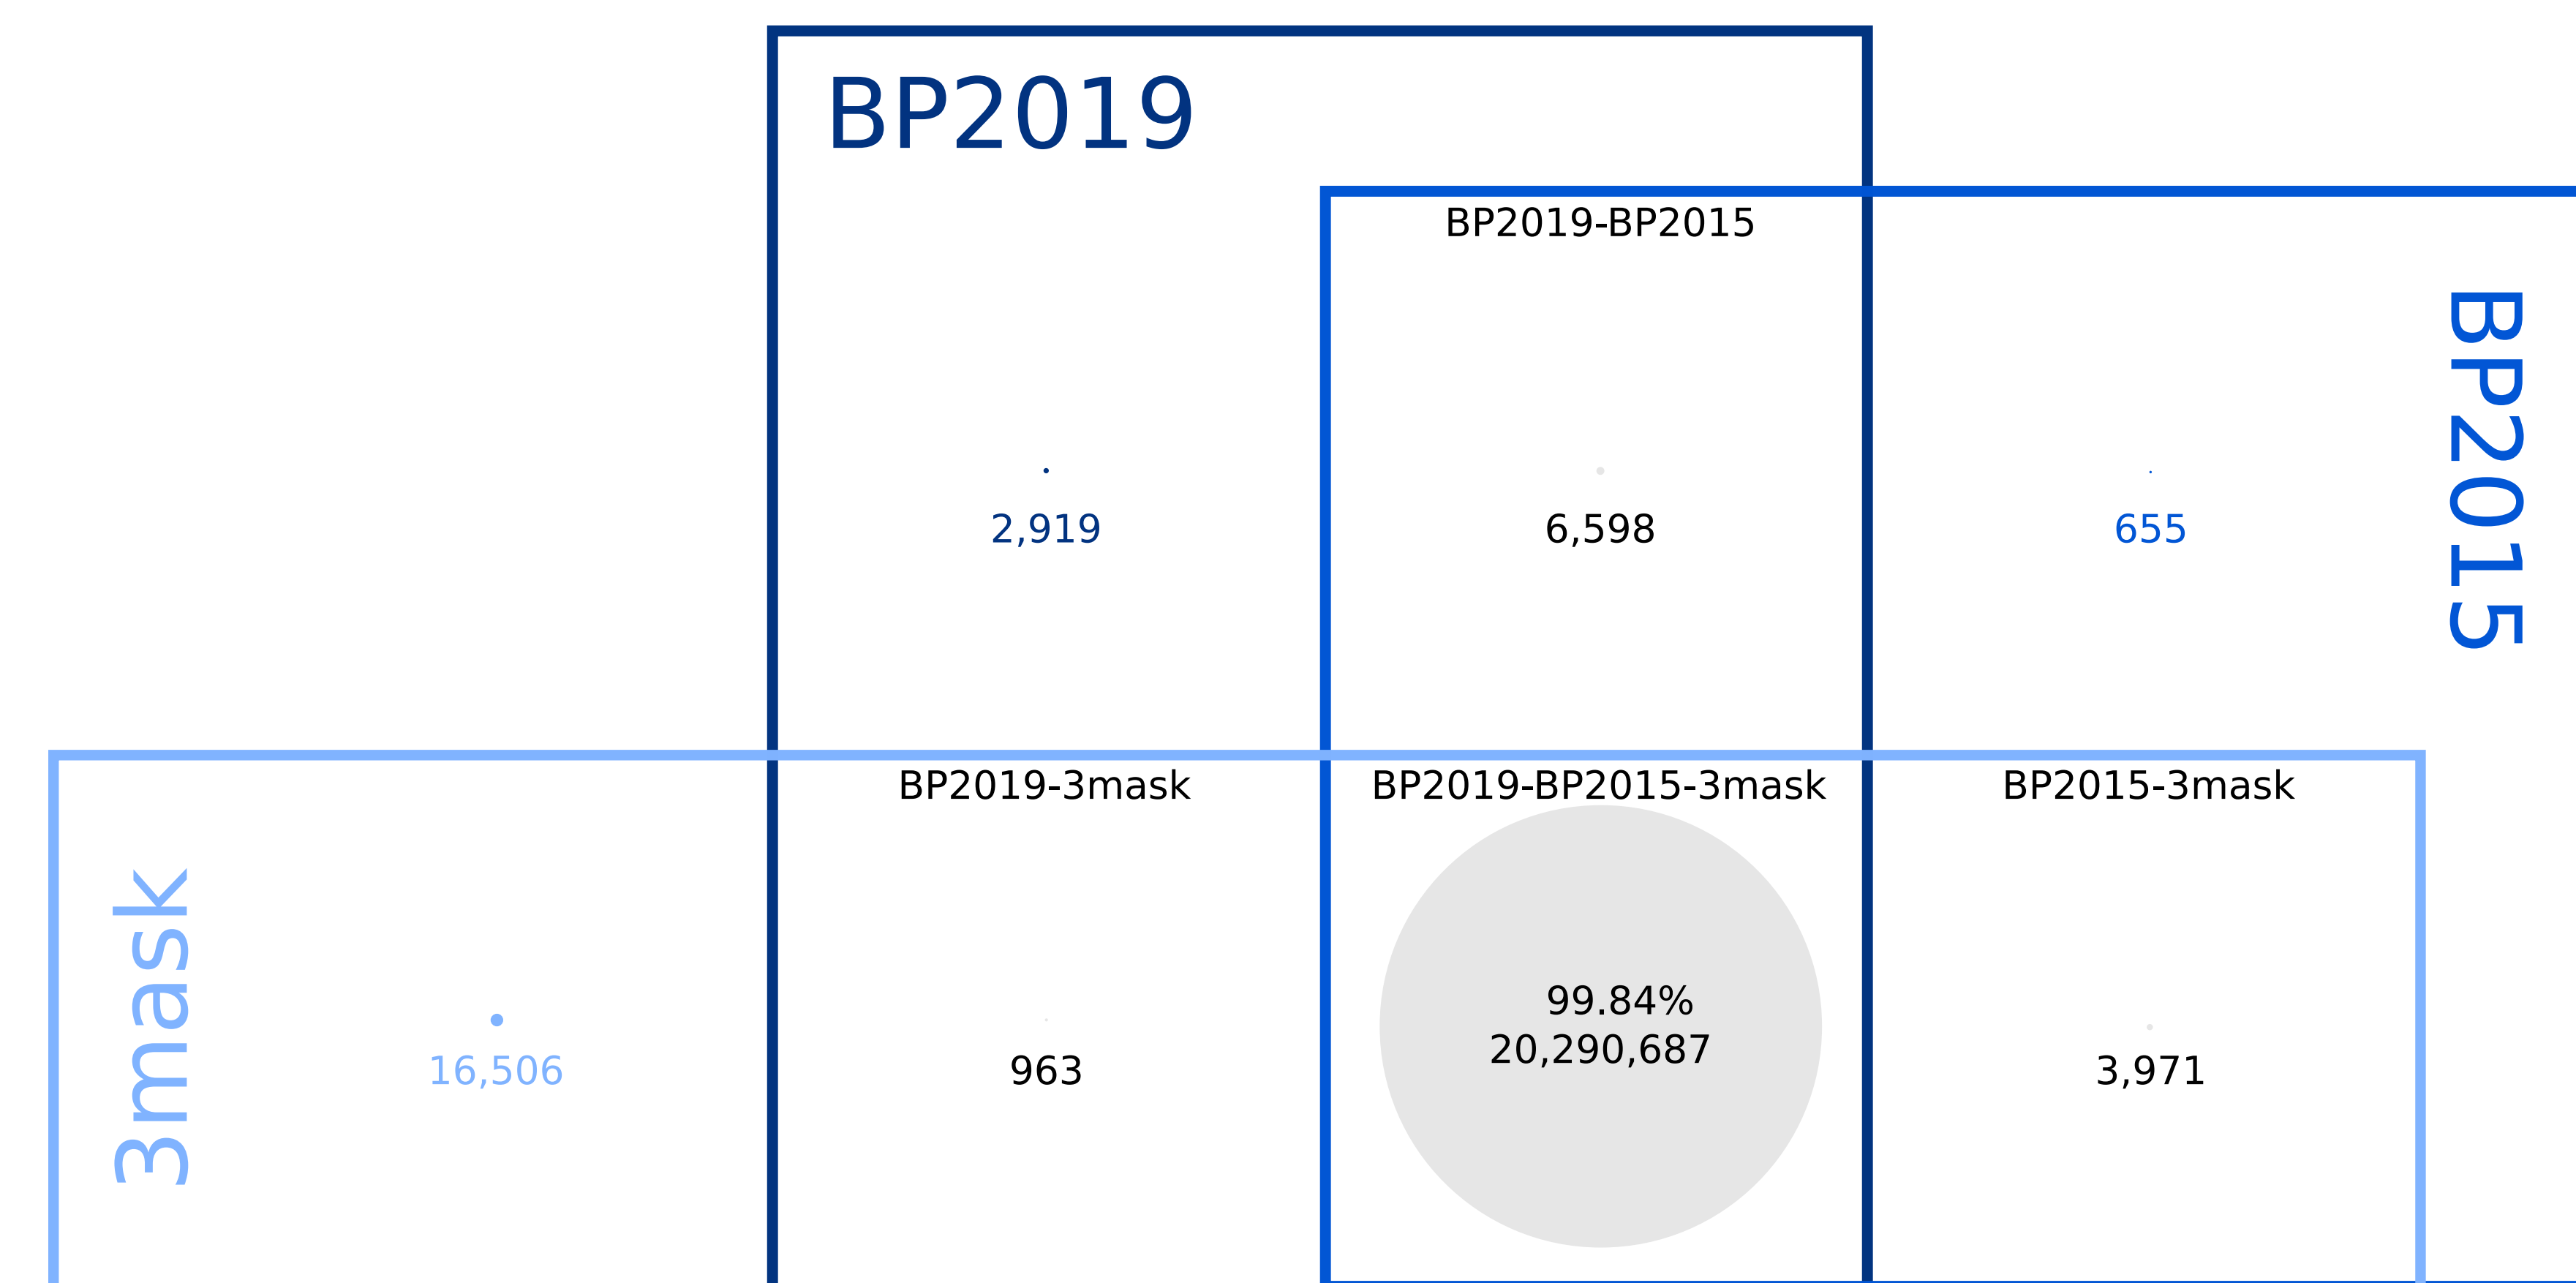

C. All variant sites after VQSR.

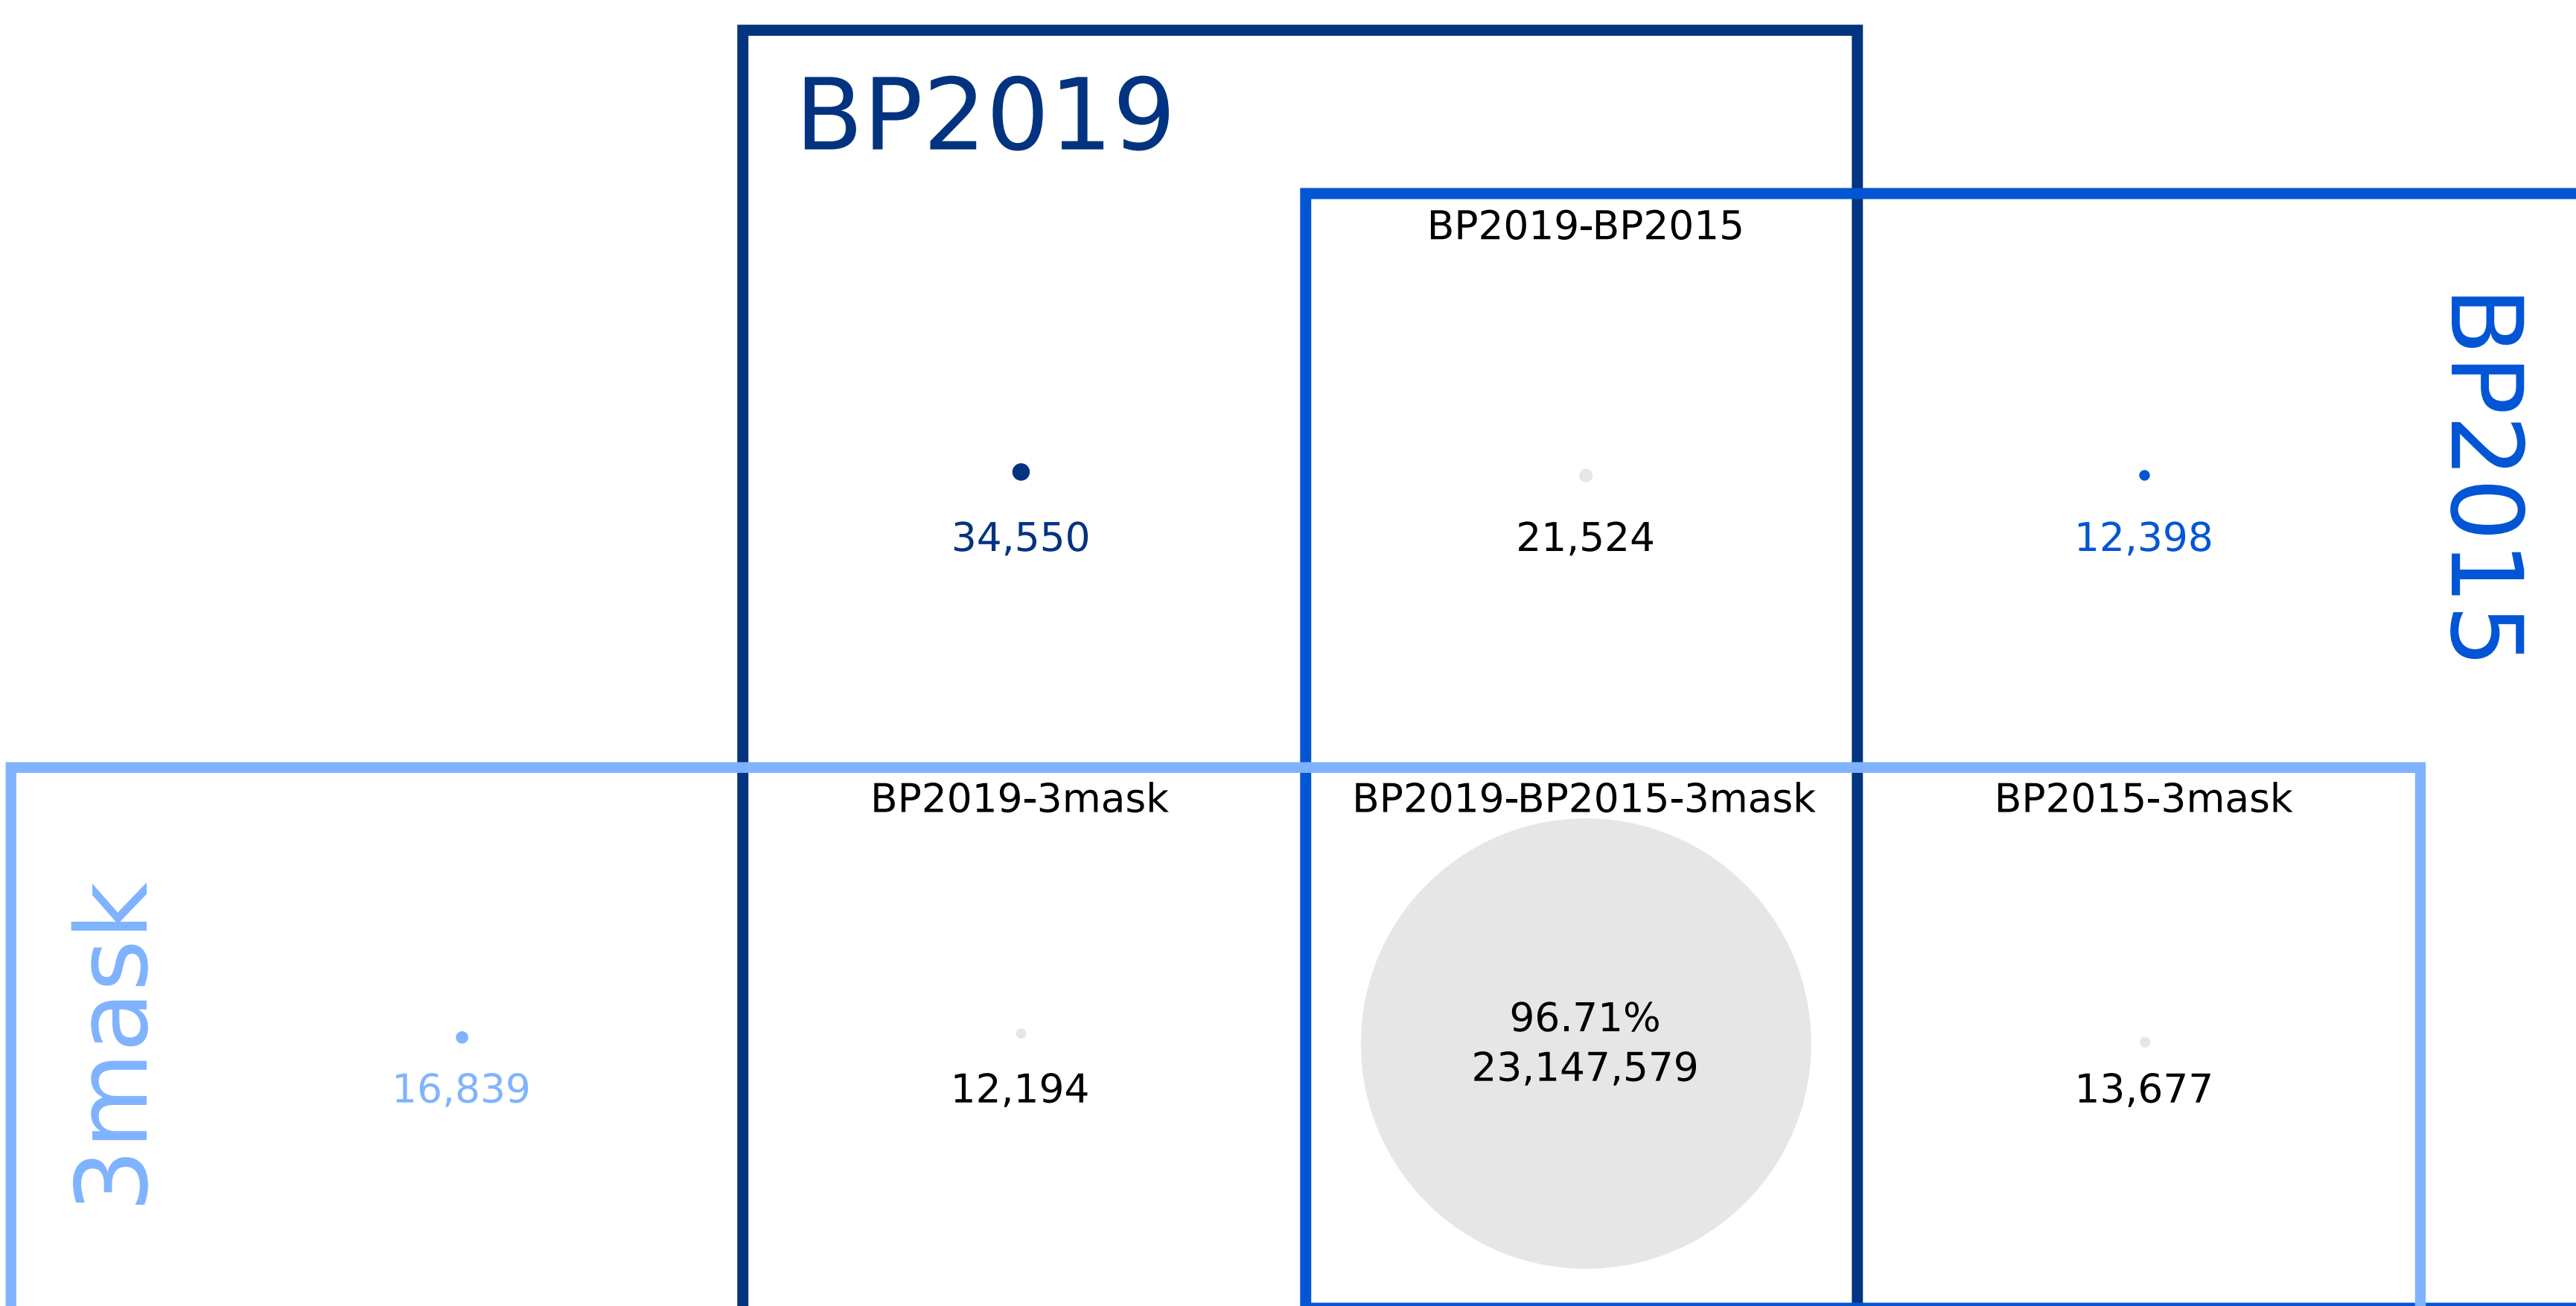

D. Biallelic SNP after VQSR.

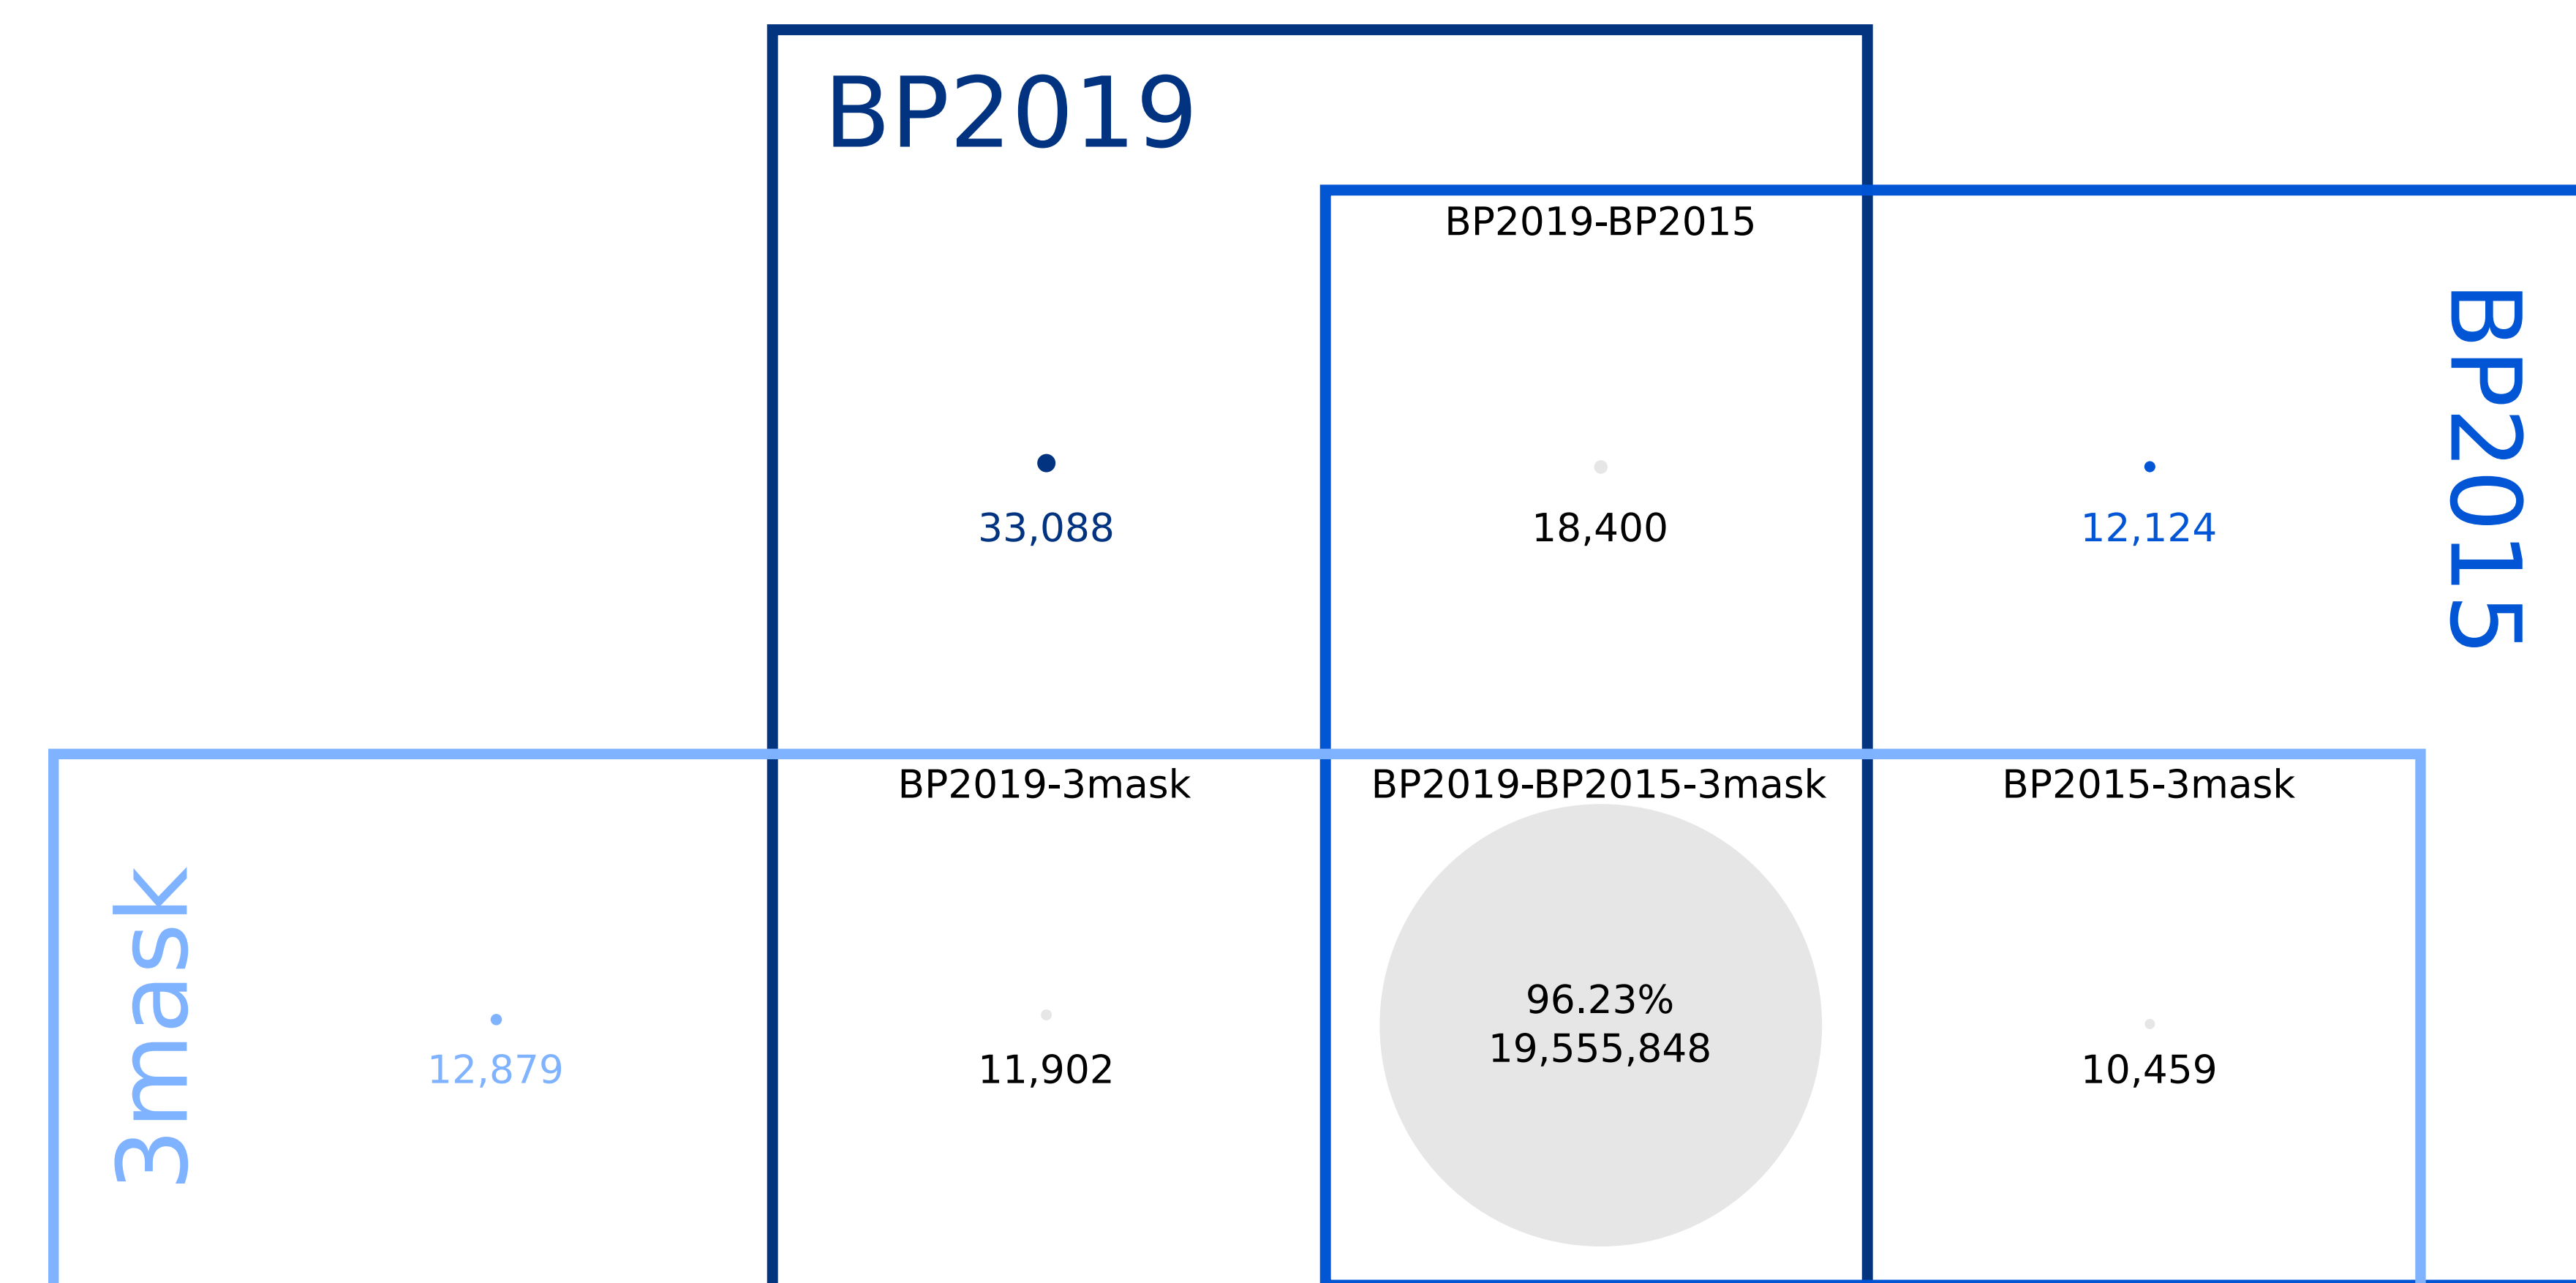

● Filtered in all (677,245)

● Filtered in all (667,599)
