# Supplementary material for: Comparison of sequencing data processing pipelines and application to underrepresented African human populations
Source: PubMed Central journal article supplement (PMC8502359; doi:10.1186/s12859-021-04407-x), 2021-10-09

# Proportion of biallelic SNPs in dbSNP v.151

**A.**

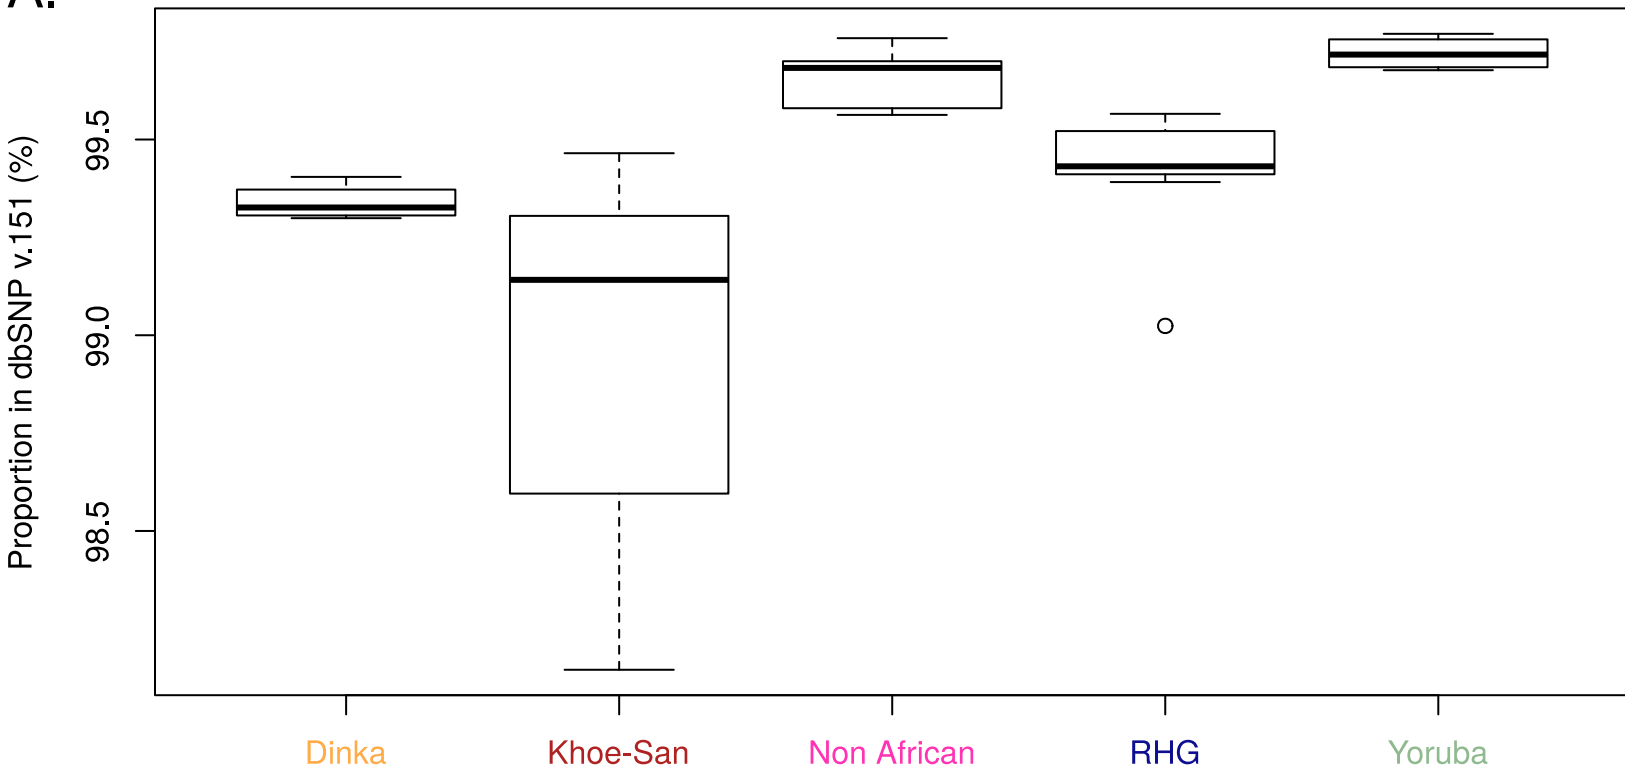

**B.**

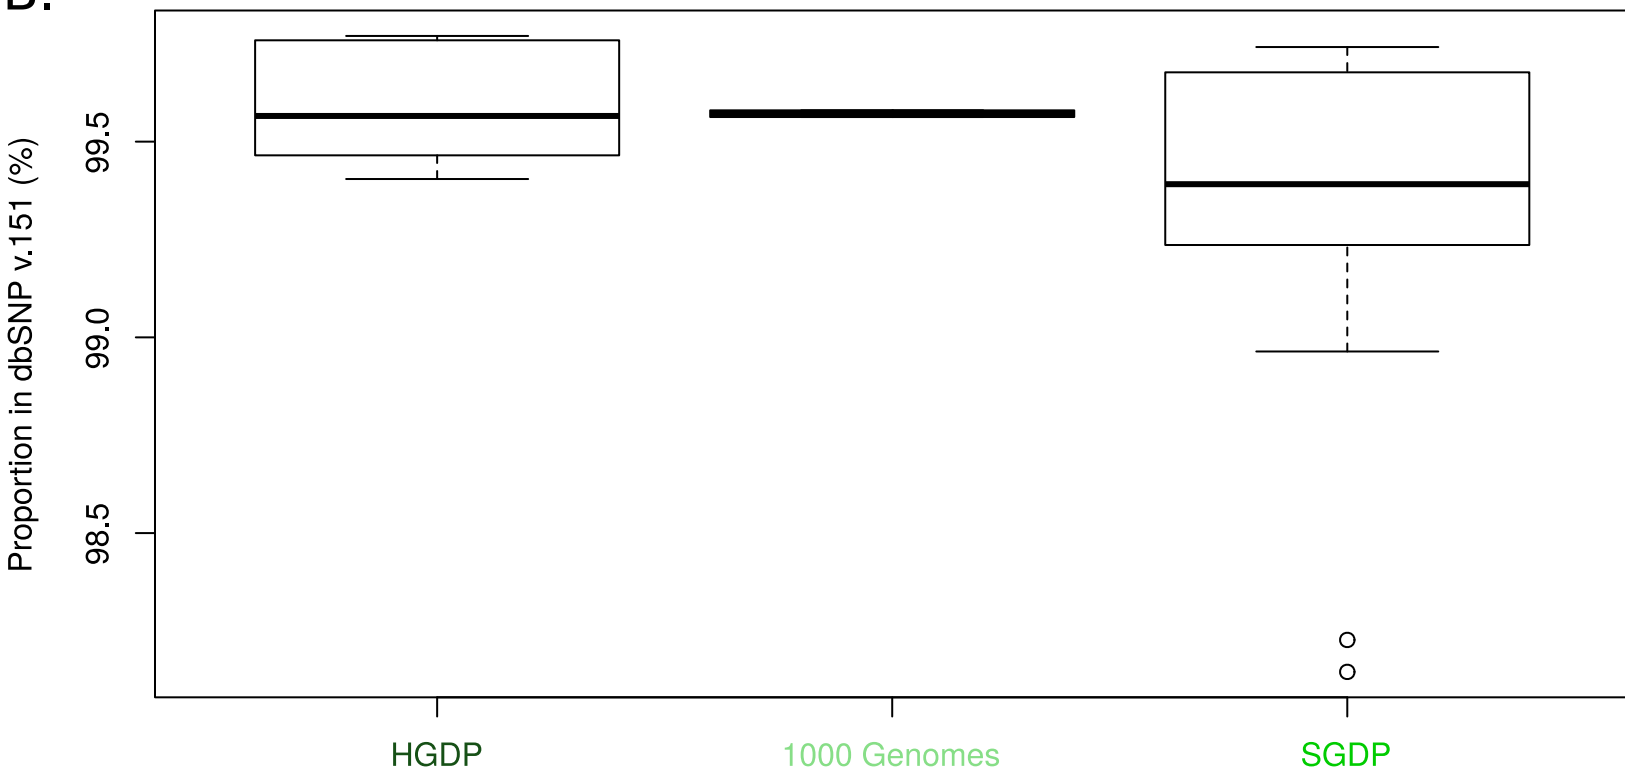

Supplement: 12859_2021_4407_MOESM7_ESM.pdf [file 12859_2021_4407_MOESM7_ESM.pdf]
